# Supplementary material
Source: Springer Nature journal article supplement (http://www.springermedizin.de/resource/supplementary/12974_2010_288_MOESM9_ESM.pdf/9601170)

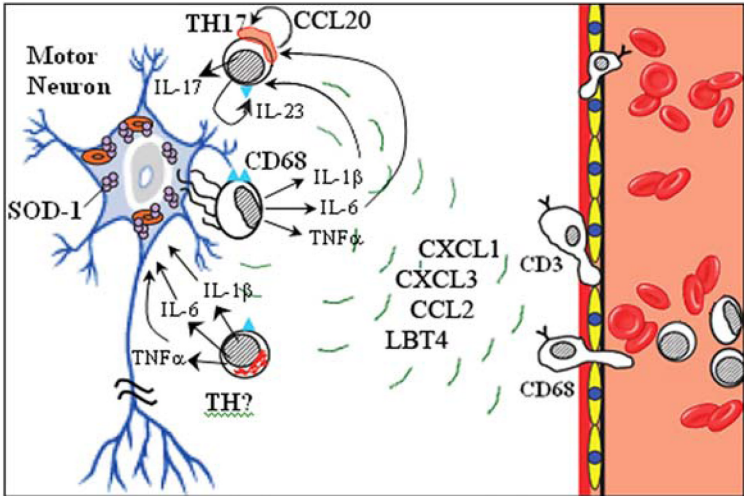

TH17 CCL20

Motor Neuron

IL-17

IL-23

SOD-1

CD68

IL-1 $\beta$

IL-6

TNF $\alpha$

CXCL1

CXCL3

CCL2

LBT4

CD3

IL-6

IL-1 $\beta$

TNF $\alpha$

TH?

CD68

Supplement: MOESM9 [file 9601170]
